# Supplementary material
Source: PubMed Central journal article supplement (PMC3144834)
Supplement: SD2.pdf [file SD2.pdf]

The following are supplemental materials and will be published online only

SUPPLEMENTARY TABLE  
Prevalence of intestinal parasitic infection at baseline and after four months of intervention\*

| Outcome (%)                 | Placebo<br>(n = 123) | Fortified biscuits<br>(n = 122) | Albendazole<br>(n = 122) | Fortified biscuits<br>plus albendazole<br>(n = 122) | Adjusted OR (95% CI) |                    | P for interaction |
|-----------------------------|----------------------|---------------------------------|--------------------------|-----------------------------------------------------|----------------------|--------------------|-------------------|
|                             |                      |                                 |                          |                                                     | Fortified biscuits   | Albendazole        |                   |
| <b>Acute infections</b>     |                      |                                 |                          |                                                     |                      |                    |                   |
| Baseline                    | 9.3                  | 9.6                             | 8.5                      | 11.1                                                | 0.66 (0.18–2.43)     | 0.64 (0.18–2.34)   | 0.668             |
| End point                   | 5.1                  | 3.5                             | 3.4                      | 3.4                                                 |                      |                    |                   |
| <b>Ascaris infections</b>   |                      |                                 |                          |                                                     |                      |                    |                   |
| Baseline                    | 66.7                 | 61.5                            | 64.8                     | 68.0                                                | 0.96 (0.52–1.78)     | 0.42† (0.25–0.71)  | 0.018             |
| End point                   | 72.4                 | 69.7                            | 55.7‡§                   | 43.4¶#                                              |                      |                    |                   |
| <b>Trichuris infections</b> |                      |                                 |                          |                                                     |                      |                    |                   |
| Baseline                    | 56.1                 | 53.3                            | 53.3                     | 58.2                                                | 0.79 (0.42–0.15)     | 0.50** (0.29–0.87) | 0.016             |
| End point                   | 63.4                 | 58.2                            | 49.2††                   | 39.3¶#                                              |                      |                    |                   |
| <b>Hookworm infections</b>  |                      |                                 |                          |                                                     |                      |                    |                   |
| Baseline                    | 4.1                  | 4.9                             | 5.7                      | 7.4                                                 | 0 (0–0)              | 0 (0–0)            | 1.0               |
| End point                   | 4.9                  | 4.9                             | 5.7                      | 5.7                                                 |                      |                    |                   |

\* Placebo = placebo de-worming and non-fortified biscuits; OR = odds ratio; CI = confidence interval.

† P = 0.001, OR adjusted for sex, age, and baseline outcome values, by logistic regression analysis.

‡ P < 0.05 vs. baseline, by McNemar test.

§ P < 0.02 vs. placebo, by chi-square test.

¶ P < 0.0001 vs. baseline, by McNemar test.

# P < 0.001 vs. placebo, by chi-square test.

\*\* P < 0.05, OR adjusted for sex, age, and baseline outcome values, by logistic regression analysis.

†† P < 0.05 vs. placebo, by chi-square test.
